# Supplementary material for: Characterization of Hormone Receptor and HER2 Status in Breast Cancer Using Mass Spectrometry Imaging
Source: MDPI journal article supplement (doi:10.3390/ijms24032860), 2023-02-02
Supplement: s1 [file s1]

# Characterization of Hormone Receptor and HER2 Status in Breast Cancer Using Mass Spectrometry Imaging

|                                                                                                                              |   |
|------------------------------------------------------------------------------------------------------------------------------|---|
| Table S1. Summary of the supervised classification .....                                                                     | 2 |
| Table S2. Outcome of the forward feature extraction.....                                                                     | 3 |
| Figure S1. MS/MS fragmentation spectra of $m/z$ 772.4 (top) and $m/z$ 1198.7 (bottom) used for protein identification. ....  | 4 |
| Figure S2. MS/MS fragmentation spectra of $m/z$ 1428.7 (top) and $m/z$ 1494.7 (bottom) used for protein identification. .... | 5 |
| Table S3. Histopathology classification of the patient cohort. ....                                                          | 6 |
| Table S4. Vimentin staining results for all TNBC cases of the validation sample set .....                                    | 7 |

| Random Forest |                       |                       |                       |                       | kNN                   |                       |                       |                       |
|---------------|-----------------------|-----------------------|-----------------------|-----------------------|-----------------------|-----------------------|-----------------------|-----------------------|
|               | ER                    | PR                    | HER2                  | TNBC                  | ER                    | PR                    | HER2                  | TNBC                  |
| Accuracy      | 0.9554                | 0.9223                | 0.9339                | 0.9787                | 0.9729                | 0.9522                | 0.9511                | 0.9869                |
| 95% CI        | (0.9527, 0.9581)      | (0.9188, 0.9258)      | (0.9306, 0.937)       | (0.9768, 0.9805)      | (0.9707, 0.9749)      | (0.9494, 0.9549)      | (0.9482, 0.9538)      | (0.9854, 0.9883)      |
| P-value       | < 2.2e <sup>-16</sup> | < 2e <sup>-16</sup>   | < 2e <sup>-16</sup>   | <2e <sup>-16</sup>    |
| Kappa         | 0.8472                | 0.8078                | 0.845                 | 0.8837                | 0.9098                | 0.885                 | 0.8863                | 0.8924                |
| Sensitivity   | 0.8383                | 0.8174                | 0.9576                | 0.9944                | 0.9242                | 0.9148                | 0.9624                | 0.9926                |
| Specificity   | 0.982                 | 0.9664                | 0.8818                | 0.8486                | 0.9839                | 0.9679                | 0.9261                | 0.9393                |
| SVM           |                       |                       |                       |                       | LDA                   |                       |                       |                       |
|               | ER                    | PR                    | HER2                  | TNBC                  | ER                    | PR                    | HER2                  | TNBC                  |
| Accuracy      | 0.9557                | 0.9081                | 0.8881                | 0.9879                | 0.9061                | 0.8121                | 0.7775                | 0.9591                |
| 95% CI        | (0.9529, 0.9583)      | (0.9043, 0.9118)      | (0.884, 0.8921)       | (0.9864, 0.9893)      | (0.9022, 0.9098)      | (0.807, 0.8171)       | (0.7721, 0.7828)      | (0.9565, 0.9616)      |
| P-value       | < 2.2e <sup>-16</sup> |
| Kappa         | 0.8433                | 0.7632                | 0.7254                | 0.935                 | 0.6509                | 0.4808                | 0.4164                | 0.7677                |
| Sensitivity   | 0.8017                | 0.7271                | 0.9613                | 0.9973                | 0.608                 | 0.4564                | 0.9314                | 0.9884                |
| Specificity   | 0.9905                | 0.9841                | 0.7269                | 0.9101                | 0.9736                | 0.9614                | 0.4383                | 0.7157                |

**Table S1.** Summary of the supervised classification of the individual hormone receptor and HER status, as calculated by the respective confusion matrix.

**Table S2.** Outcome of the forward feature extraction form the linear discriminant analysis classification model.

| <b>ER</b>  |          | <b>PR</b>  |          | <b>HER2</b> |          | <b>TNBC</b> |          |
|------------|----------|------------|----------|-------------|----------|-------------|----------|
| <i>m/z</i> | Accuracy | <i>m/z</i> | Accuracy | <i>m/z</i>  | Accuracy | <i>m/z</i>  | Accuracy |
| 1198.7     | 0.8675   | 1198.7     | 0.7652   | 606.1       | 0.7462   | 1198.7      | 0.9079   |
| 1200.7     | 0.8789   | 1200.7     | 0.7802   | 995.5       | 0.7483   | 1555.8      | 0.9168   |
| 911.4      | 0.8851   | 1555.8     | 0.7857   | 842.5       | 0.7511   | 1584.8      | 0.9222   |
| 805.4      | 0.8934   | 1104.6     | 0.7904   | 882.5       | 0.7542   | 674.3       | 0.9301   |
| 1104.6     | 0.896    | 1584.8     | 0.7959   | 688.4       | 0.7567   | 1094.6      | 0.9353   |

**Figure S1.** MS/MS fragmentation spectra of  $m/z$  772.4 (top) and  $m/z$  1998.7 (bottom) used for protein identification.

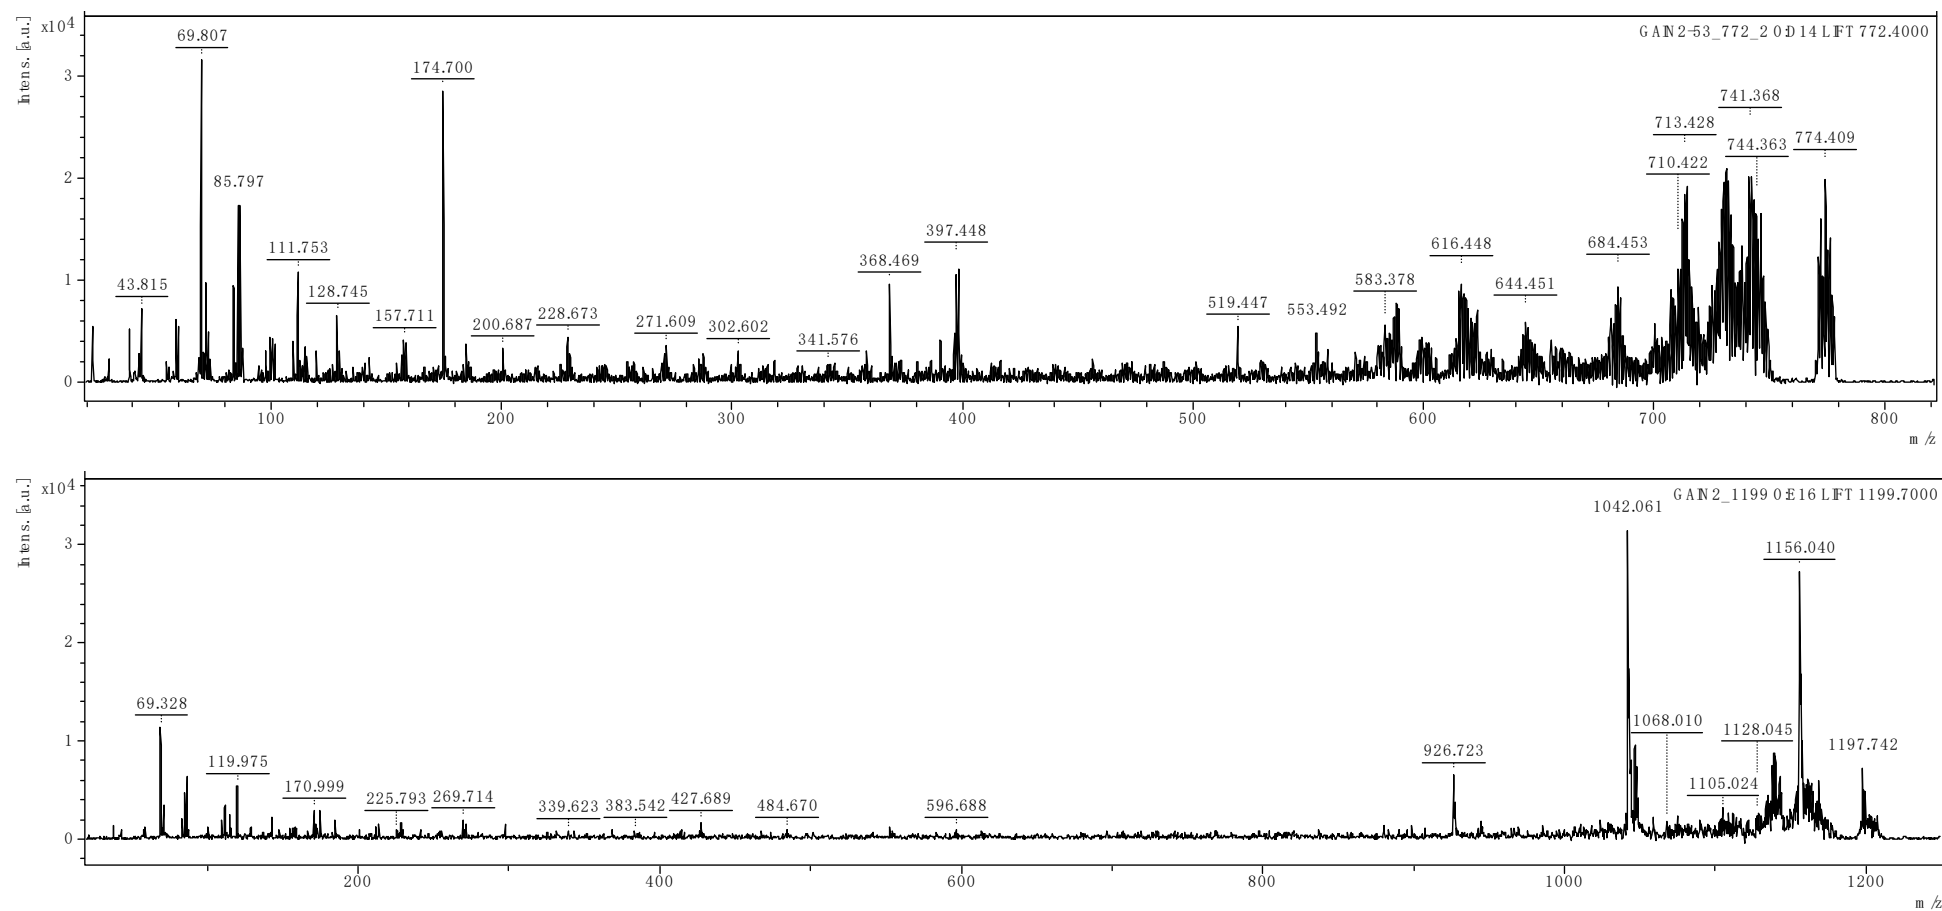

**Figure S2.** MS/MS fragmentation spectra of  $m/z$  1428.7 (top) and  $m/z$  1494.7 (bottom) used for protein identification.

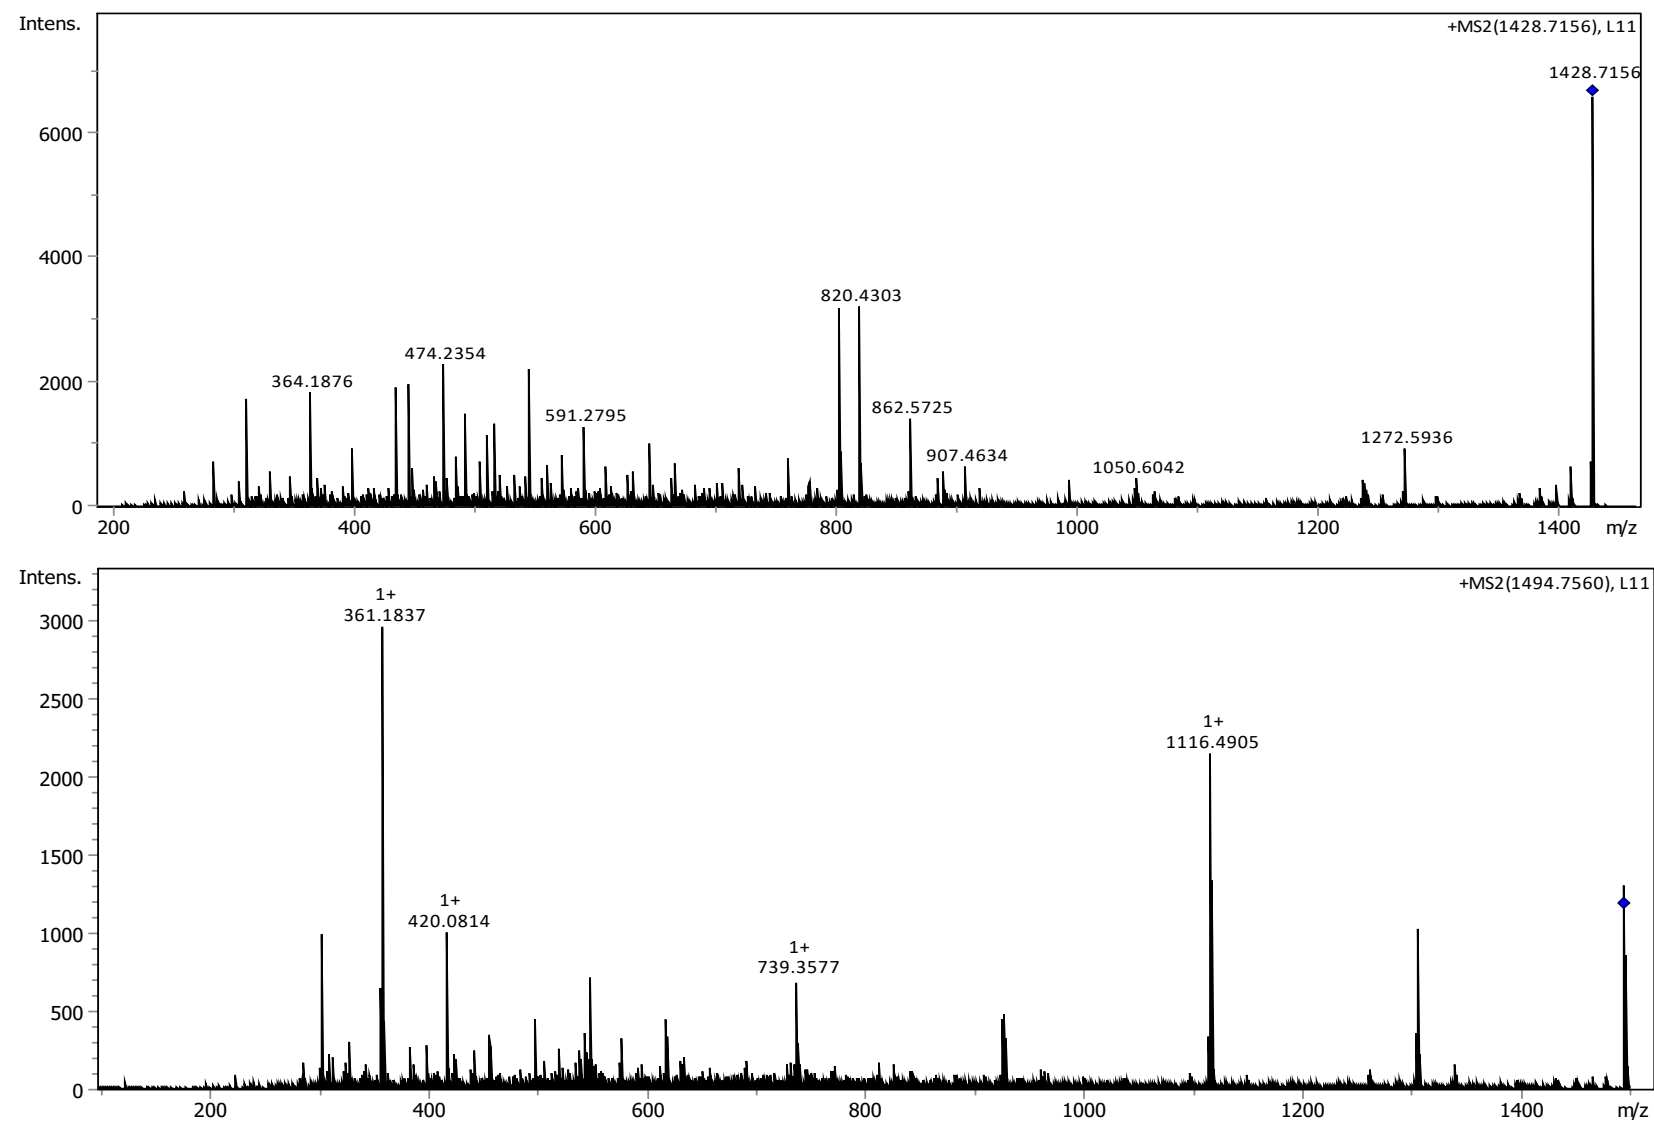

| Parameter              | GAIN-1 cohort<br>n(%) | Study cohort<br>n(%) | p-value | MSI cohort<br>n (%)      |
|------------------------|-----------------------|----------------------|---------|--------------------------|
| <b>Age (years)</b>     |                       |                      |         |                          |
| Mean, range            | 50 (20-72)            | 50 (23-71)           | 0.1122  |                          |
| < 40                   | 438 (14.6)            | 194 (14.7)           | 0.2443  |                          |
| 40-49                  | 1057 (35.5)           | 488 (14.7)           |         |                          |
| 50-59                  | 968 (32.3)            | 418 (31.7)           |         |                          |
| ≥60                    | 531 (17.7)            | 218 (16.5)           |         |                          |
| <b>Surgery</b>         |                       |                      |         |                          |
| BCS                    | 1672 (55.9)           | 753 (57.1)           | 0.2354  |                          |
| Mastectomy             | 1320 (44.1)           | 565 (42.9)           |         |                          |
| Unkonown               | 2                     | 0                    |         |                          |
| <b>Chemotherapy</b>    |                       |                      |         |                          |
| EPC                    | 1500 (50.1)           | 664 (50.4)           | 0.7967  |                          |
| EC-PwX                 | 1494 (49.9)           | 654 (49.6)           |         |                          |
| <b>Local ER</b>        |                       |                      |         |                          |
| Positive               | 2206 (73.7)           | 974 (73.9)           | 0.8345  | <b>Re-evaluated ER</b>   |
| Negative               | 787 (73.7)            | 344 (26.1)           |         | 850 (80.7)               |
| Unknown                | 1                     | 0                    |         | 203 (19.3)               |
| <b>Local PR</b>        |                       |                      |         |                          |
| Positive               | 2011 (67.2)           | 893 (67.8)           | 0.5831  | <b>Re-evaluated PR</b>   |
| Negative               | 982 (32.8)            | 425 (32.2)           |         | 739 (69.9)               |
| Unknown                | 1                     | 0                    |         | 318 (30.1)               |
| <b>Local HER2</b>      |                       |                      |         |                          |
| Positive               | 724 (24.8)            | 321 (25.1)           | 0.7957  | <b>Re-evaluated HER2</b> |
| Negative               | 2191 (75.2)           | 959 (74.9)           |         | 369 (34.6)               |
| Unknown                | 79                    | 38                   |         | 696 (65.4)               |
| <b>Local subtypes</b>  |                       |                      |         |                          |
| Luminal A              | 1223 (41.8)           | 542 (42.0)           | 0.5372  | <b>Subtypes</b>          |
| Luminal B              | 1031 (35.2)           | 465 (36.0)           |         | 596 (58.3)               |
| ER-/PR-/HER2+          | 254 (8.7)             | 102 (7.9)            |         | 121 (11.8)               |
| TNBC                   | 421 (14.4)            | 182 (14.1)           |         | 200 (19.6)               |
| Unknown                | 65                    | 27                   |         | 105 (10.3)               |
| <b>Histologic type</b> |                       |                      |         |                          |
| Ductal (NST)           | 2314 (77.3)           | 1023 (77.6)          | 0.2022  |                          |
| Lobular                | 374 (12.5)            | 151 (11.5)           |         |                          |
| Other                  | 306 (10.2)            | 144 (10.9)           |         |                          |
| <b>Tumor grade</b>     |                       |                      |         |                          |
| G1                     | 96 (3.2)              | 44 (77.6)            |         |                          |
| G2                     | 1507 (50.4)           | 649 (49.3)           |         |                          |
| G3                     | 1385 (46.4)           | 624 (47.4)           |         |                          |
| Unknown                | 6                     | 1                    |         |                          |
| <b>Tumor stage</b>     |                       |                      |         |                          |
| pT1                    | 955 (32.0)            | 423 (32.2)           | 0.9392  |                          |
| pT2                    | 1669 (55.9)           | 738 (49.3)           |         |                          |
| pT3                    | 305 (10.2)            | 130 (9.9)            |         |                          |
| pT4                    | 55 (1.8)              | 23 (1.8)             |         |                          |
| Unknown                | 10                    | 4                    |         |                          |
| <b>Nodal stage</b>     |                       |                      |         |                          |
| pN1                    | 1131 (37.8)           | 533 (40.4)           | 0.0273  |                          |
| pN2                    | 1058 (35.3)           | 449 (34.1)           |         |                          |
| pN3                    | 805 (26.9)            | 336 (25.5)           |         |                          |

Table S3. Histopathology classification of the patient cohort. GAIN-1 corresponds to the larger cohort from which the study cohort was obtained, with the respective local characterization. The study cohort was measured with mass spectrometry imaging (MSI). However, to avoid inter-observer bias, two pathologists re-evaluated the study cohort (with the exception of lost cores). This classification (summarized in the last column) was used as the basis for training of classification models.

EC-PwX, epirubicin, cyclophosphamide, paclitaxel and capecitabine; EPC, epirubicin, paclitaxel and cyclophosphamide; TNBC, triple negative breast cancer; ER, Estrogen receptor; GAIN, German Adjuvant Intergroup Node; PR, progesterone receptor; HER2, human epidermal growth factor receptor 2; BCS, breast conserving therapy; NST, no special type.

Table S4. Vimentin staining results for all TNBC (n=51) cases of the validation sample set, specified for tumor subtype. NST – no special type.

| Vimentin staining | n (%)     | Tumor subtype      | n  |
|-------------------|-----------|--------------------|----|
| Strong positive   | 17 (33.3) | NST, G3            | 14 |
|                   |           | Medullary, G3      | 2  |
|                   |           | Metaplastic, G3    | 1  |
| Medium positive   | 15 (29.4) | NST, G3            | 9  |
|                   |           | NST, G2            | 3  |
|                   |           | Medullary, G3      | 3  |
| Weak positive     | 8 (15.7)  | NST, G3            | 4  |
|                   |           | Medullary, G3      | 2  |
|                   |           | Lobular, G3        | 1  |
|                   |           | Ductulolobular, G3 | 1  |
| Negative          | 11 (21.6) | NST, G3            | 4  |
|                   |           | Lobular, G2        | 1  |
|                   |           | NST, G2            | 1  |
|                   |           | NST, G1            | 1  |
|                   |           | Medullary, G3      | 1  |
|                   |           | Apocrine, G3       | 1  |
|                   |           | Papillary, G2      | 1  |
|                   |           | Ductulolobular, G3 | 1  |
